# Supplementary material for: Synergistic effect of graphene oxide and hydroxylated graphene on the enhanced properties of cement composites
Source: Royal Society of Chemistry journal article supplement (doi:10.1039/d2ra05069b), 2022-01-01
Supplement: d2ra05069b1.pdf [file d2ra05069b1.pdf]

# Supporting Information

## Synergistic effect of graphene oxide and hydroxylated-graphene on the enhanced properties of cement composites

Yundong Pu,<sup>a</sup> Sen Yang,<sup>a</sup> Meng Qi,<sup>b</sup> Kuang Sheng,<sup>a</sup> Junfeng Bi,<sup>a</sup> Fukun Fan,<sup>a</sup> Xiaoya

Yuan<sup>a,\*</sup>

*a. College of Materials Science and Engineering, Chongqing Jiaotong University, Chongqing 400074, China.*

*b. School of Civil Engineering, Chongqing Jiaotong University, Chongqing 400074, china.*

### 1. Figures

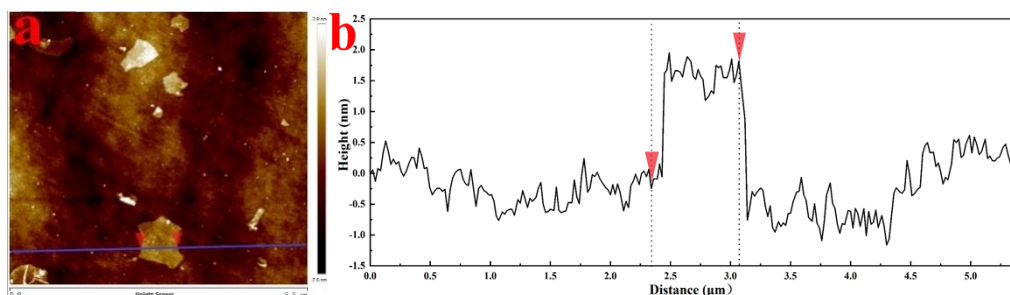

**Figure S1.** Typical AFM images (a) and the corresponding height profiles (b) of GO.

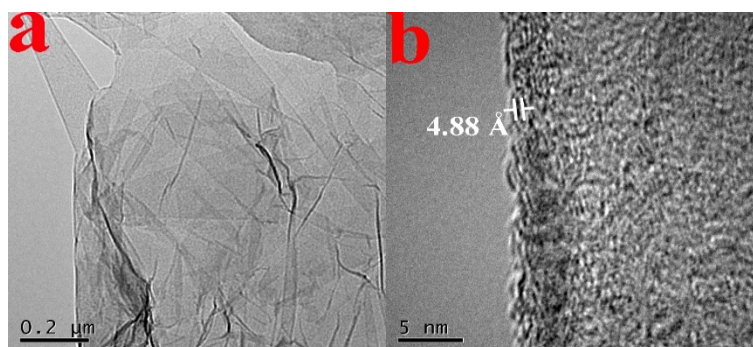

**Figure S2.** HRTEM images of GO.

---

\* Corresponding author. *Tel.:* +86-23-62789154; *Fax:* +86-23-62789154.

*E-mail address:* yuanxy@cqjtu.edu.cn (X.Y Yuan)

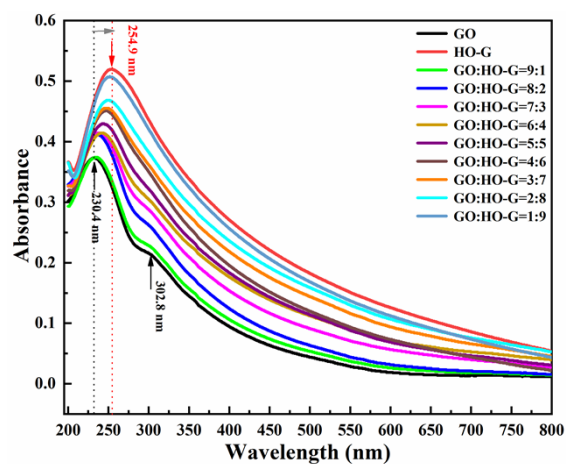

**Figure S3.** UV-vis spectra of aqueous solutions of different HO-G to GO ratios.

Solution concentration was kept at 10mg/L.

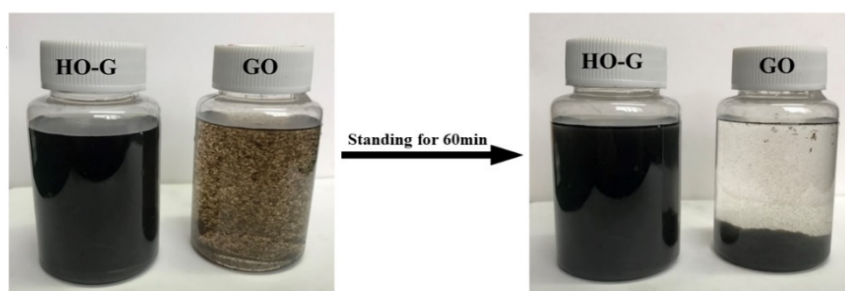

**Figure S4.** Digital images of HO-G or GO dispersions (1 mg/mL, 5 mL) in saturated  $\text{Ca}(\text{OH})_2$  solution (100 mL).

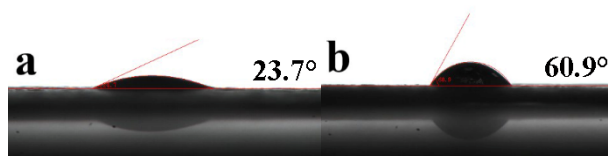

**Figure S5.** The contact angles of (a) GO, (b) HO-G.

## 2. Tables

**Table S1.** Chemical compositions of cement (%).

| Chemical composition           | Test value (%) |
|--------------------------------|----------------|
| Al <sub>2</sub> O <sub>3</sub> | 4.47           |
| SiO <sub>2</sub>               | 21.5           |
| Fe <sub>2</sub> O <sub>3</sub> | 3.37           |
| CaO                            | 65.84          |
| MgO                            | 3.18           |
| SO <sub>3</sub>                | 0.3            |
| NaO                            | 0.49           |
| f-CaO                          | 0.78           |
| C <sub>3</sub> S               | 58.92          |
| C <sub>2</sub> S               | 20.19          |
| C <sub>3</sub> A               | 8.12           |
| C <sub>4</sub> AF              | 8.21           |

**Table S2.** Physical properties of cement.

| properties                                 | Test value |
|--------------------------------------------|------------|
| Fineness (%)                               | 0.6        |
| Density (g/cm <sup>3</sup> )               | 3.15       |
| Specific surface area (m <sup>2</sup> /kg) | 350        |
| Standard Consistency (%)                   | 25.6       |
| Soundness (mm)                             | 0.5        |
| Initial Setting Time (min)                 | 132        |
| Final Setting Time (min)                   | 198        |

**Table S3.** Gradation of standard sand.

| Square mesh size (mm) | Remaining on the sieve (%) |
|-----------------------|----------------------------|
| 2.0                   | 0                          |
| 1.6                   | 7 ± 4                      |
| 1.0                   | 33 ± 4                     |
| 0.5                   | 67 ± 4                     |
| 0.16                  | 87 ± 4                     |
| 0.08                  | 99 ± 1                     |

**Table S4.** Compressive and Flexural strength of cement mortars with the hybrids of various GO: HO-G ratios at 3, 7 and 28d.

| Samples                       | Compressive strength <sup>a</sup> (Mpa)/Change <sup>b</sup> (%) |            |            | Flexural strength <sup>a</sup> (Mpa) /Change <sup>b</sup> (%) |            |            |
|-------------------------------|-----------------------------------------------------------------|------------|------------|---------------------------------------------------------------|------------|------------|
|                               | 3d                                                              | 7d         | 28d        | 3d                                                            | 7d         | 28d        |
| PLAIN                         | 29.6/0                                                          | 37.5/0     | 46.8/0     | 10.6/0                                                        | 10.9/0     | 12/0       |
| P <sub>HO-G</sub>             | 39.1/+32.1                                                      | 42.9/+14.4 | 54.1/+15.6 | 10.9/+2.8                                                     | 11.1/+1.8  | 12.4/+3.3  |
| G <sub>1</sub> H <sub>9</sub> | 47.5/+60.5                                                      | 50.1/+33.6 | 60.1/+28.4 | 11.1/+4.7                                                     | 11.4/+4.6  | 12.8/+6.7  |
| G <sub>2</sub> H <sub>8</sub> | 46.3/+56.4                                                      | 50.3/+34.1 | 56.6/+20.9 | 11.3/+6.6                                                     | 11.9/+9.2  | 12.5/+4.2  |
| G <sub>3</sub> H <sub>7</sub> | 50.3/+69.9                                                      | 55.0/+46.7 | 62.5/+33.5 | 11.3/+6.6                                                     | 12.1/+11.0 | 12.9/+7.5  |
| G <sub>4</sub> H <sub>6</sub> | 47.4/+60.1                                                      | 54.0/+44.0 | 63.1/+34.8 | 11.3/+6.6                                                     | 12.1/+11.0 | 13.2/+10.0 |
| G <sub>5</sub> H <sub>5</sub> | 54.2/+83.1                                                      | 56.9/+51.7 | 65.6/+40.2 | 12.0/+13.2                                                    | 13.3/+22.0 | 14.1/+17.5 |
| G <sub>6</sub> H <sub>4</sub> | 52.2/+76.4                                                      | 57.9/+54.4 | 63.0/+34.6 | 11.7/+10.4                                                    | 13/+19.3   | 13.4/+11.7 |
| G <sub>7</sub> H <sub>3</sub> | 49.3/+66.6                                                      | 54.7/+45.9 | 59.8/+27.8 | 12.3/+16.0                                                    | 13.1/+20.2 | 13.9/+15.8 |
| G <sub>8</sub> H <sub>2</sub> | 51.7/+74.7                                                      | 57.7/+53.9 | 58.6/+25.2 | 12.2/+15.1                                                    | 13.3/+22.0 | 14.1/+17.5 |
| G <sub>9</sub> H <sub>1</sub> | 50.5/+70.6                                                      | 53.6/+42.9 | 58.2/+24.4 | 12.1/+14.2                                                    | 13.2/+21.1 | 14.0/+16.7 |
| P <sub>GO</sub>               | 36.5/+23.3                                                      | 46.4/+23.7 | 54.8/+17.1 | 12.3/+16.0                                                    | 13.4/+22.9 | 14.6/+21.7 |

a. Average value.

b. Compared to PLAIN.

**Table S5.** The improvement ratio of the compressive strength of cement mortars with the hybrids of various GO: HO-G ratios at 3, 7 and 28d.

| Samples                       | Improvement ratio of the compressive strength (%) |       |       |                             |       |       |
|-------------------------------|---------------------------------------------------|-------|-------|-----------------------------|-------|-------|
|                               | Compared to P <sub>HO-G</sub>                     |       |       | Compared to P <sub>GO</sub> |       |       |
|                               | 3d                                                | 7d    | 28d   | 3d                          | 7d    | 28d   |
| G <sub>1</sub> H <sub>9</sub> | +17.1                                             | +16.8 | +11.1 | +30.1                       | +8.0  | +9.7  |
| G <sub>2</sub> H <sub>8</sub> | +15.5                                             | +17.2 | +4.6  | +26.8                       | +8.4  | +3.3  |
| G <sub>3</sub> H <sub>7</sub> | +22.3                                             | +28.2 | +15.5 | +37.8                       | +18.5 | +14.1 |
| G <sub>4</sub> H <sub>6</sub> | +17.5                                             | +25.9 | +16.6 | +29.9                       | +16.4 | +15.1 |
| G <sub>5</sub> H <sub>5</sub> | +27.9                                             | +32.6 | +21.3 | +48.5                       | +22.6 | +19.7 |
| G <sub>6</sub> H <sub>4</sub> | +25.1                                             | +35.0 | +16.5 | +43.0                       | +24.8 | +15.0 |
| G <sub>7</sub> H <sub>3</sub> | +20.7                                             | +27.5 | +10.5 | +35.1                       | +17.9 | +9.1  |
| G <sub>8</sub> H <sub>2</sub> | +24.4                                             | +34.5 | +8.3  | +41.6                       | +24.4 | +6.9  |
| G <sub>9</sub> H <sub>1</sub> | +22.6                                             | +24.9 | +7.6  | +38.3                       | +15.5 | +6.2  |

**Table S6.** The improvement ratio of the flexural strength of cement mortars with the hybrids of various GO: HO-G ratios at 3, 7 and 28d.

| Samples                       | Improvement ratio of the flexural strength (%) |       |       |                             |       |       |
|-------------------------------|------------------------------------------------|-------|-------|-----------------------------|-------|-------|
|                               | Compared to P <sub>HO-G</sub>                  |       |       | Compared to P <sub>GO</sub> |       |       |
|                               | 3d                                             | 7d    | 28d   | 3d                          | 7d    | 28d   |
| G <sub>1</sub> H <sub>9</sub> | +1.8                                           | +2.7  | +3.2  | -9.8                        | -14.9 | -12.3 |
| G <sub>2</sub> H <sub>8</sub> | +3.7                                           | +7.2  | +0.8  | -8.1                        | -11.2 | -14.4 |
| G <sub>3</sub> H <sub>7</sub> | +3.7                                           | +9.0  | +4.0  | -8.1                        | -9.7  | -11.6 |
| G <sub>4</sub> H <sub>6</sub> | +3.7                                           | +9.0  | +6.5  | -8.1                        | -9.7  | -9.6  |
| G <sub>5</sub> H <sub>5</sub> | +10.1                                          | +19.8 | +13.7 | -2.4                        | -0.7  | -3.4  |
| G <sub>6</sub> H <sub>4</sub> | +7.3                                           | +17.1 | +8.1  | -4.9                        | -3.0  | -8.2  |
| G <sub>7</sub> H <sub>3</sub> | +12.8                                          | +18.0 | +12.1 | 0                           | -2.2  | -4.8  |
| G <sub>8</sub> H <sub>2</sub> | +11.9                                          | +19.8 | +13.7 | -0.8                        | -0.7  | -3.4  |
| G <sub>9</sub> H <sub>1</sub> | +11.0                                          | +18.9 | +12.9 | -1.6                        | -1.4  | -4.1  |
